# Supplementary material
Source: publisher site journal article supplement (https://www.dovepress.com/article/376199)
Supplement: Supplementary file 1 [file get_supplementary_file.php]

# Supplemental Material

## Supplemental Table S1. Patient inclusion/exclusion criteria

| Inclusion                                                                                                                                                                                                                                                                                                                                                                                                                                                                                                                                                                                                                                                                                                                                                                                                                                                                                             |
|-------------------------------------------------------------------------------------------------------------------------------------------------------------------------------------------------------------------------------------------------------------------------------------------------------------------------------------------------------------------------------------------------------------------------------------------------------------------------------------------------------------------------------------------------------------------------------------------------------------------------------------------------------------------------------------------------------------------------------------------------------------------------------------------------------------------------------------------------------------------------------------------------------|
| <ul style="list-style-type: none"><li>• Patients who are able to give written informed consent</li><li>• Patients 50 years of age or older</li><li>• Patients with a diagnosis of CNV secondary to AMD in the study eye, for which brolocizumab treatment was prescribed by the treating physician; this includes patients with lesion(s) with less than 50% hemorrhage, less than 50% fibrosis, and/or serous pigment epithelial detachment</li><li>• Patients who have been previously treated with an anti-VEGF from which they were switched to brolocizumab</li><li>• Patients who have received <math>\geq 3</math> injections of brolocizumab</li><li>• Patients with BCVA score in the study eye between 19 and 78 letters inclusively, using ETDRS visual acuity testing charts at a testing distance of 4 meters (approximate Snellen equivalent of 20/32 to 20/400 at Screening)</li></ul> |
| Exclusion                                                                                                                                                                                                                                                                                                                                                                                                                                                                                                                                                                                                                                                                                                                                                                                                                                                                                             |
| <ul style="list-style-type: none"><li>• Patients with structural foveal damage, including advanced subretinal fibrosis or significant geographic atrophy involving the foveal centre (lack of morphological reserve) in the study eye</li><li>• Patients with confounding severe ocular disease in the study eye – such as uncontrolled glaucoma, diabetic retinopathy likely to be visually significant within 2 years, cataract presumably requiring operation within 2 years – vitreous or pre-retinal hemorrhage obscuring the central macula, or presence of rhegmatogenous retinal detachment</li><li>• Patients with polypoidal choroidal vasculopathy in the study eye</li></ul>                                                                                                                                                                                                              |

- Patients with active or suspected ocular or periocular infections in either eye
- Patients with active IOI in either eye
- Patients with physical or mental disabilities or who were being treated with other medications or procedures that prevented accurate vision testing

## Supplemental Figure S1. Inclusion of patients submitted for review

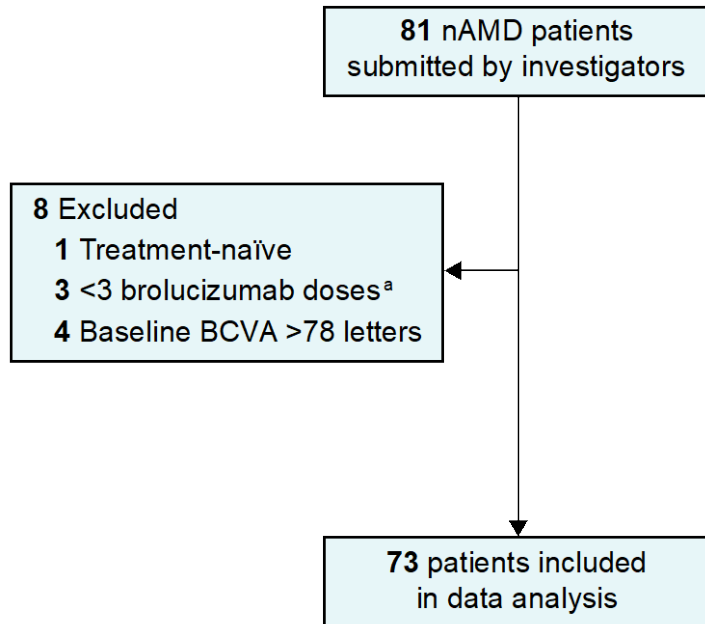

<sup>a</sup> One patient developed moderate anterior and posterior IOI after his first dose. Brolocizumab was discontinued.

BCVA, best-corrected visual acuity; IOI, intraocular inflammation; nAMD, neovascular age-related macular degeneration

**Supplemental Figure S2. Change in BCVA by treatment visit**

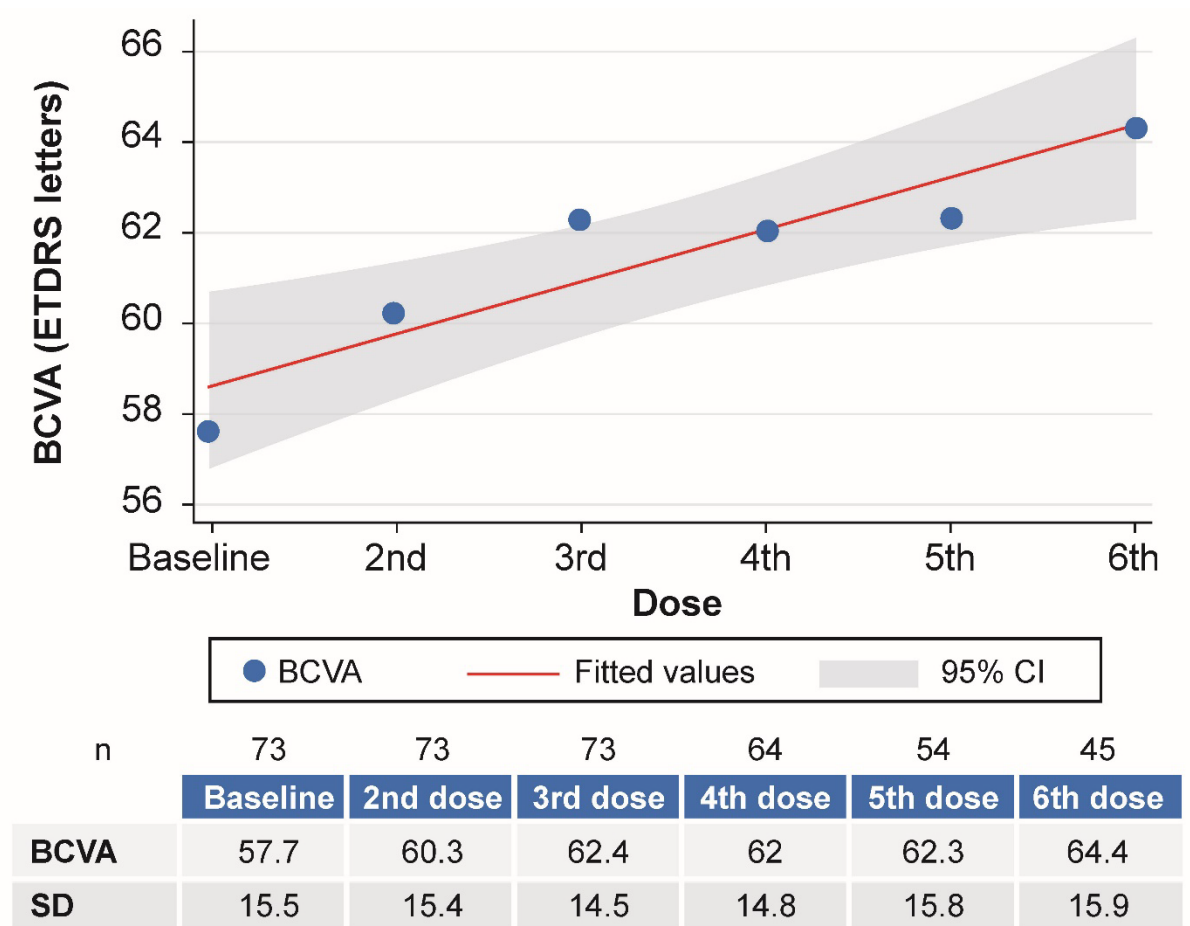

BCVA, best-corrected visual acuity; CI, confidence interval; ETDRS, Early Treatment Diabetic Retinopathy Study; SD, standard deviation

Supplemental Figure S3. Change in CRT by treatment visit

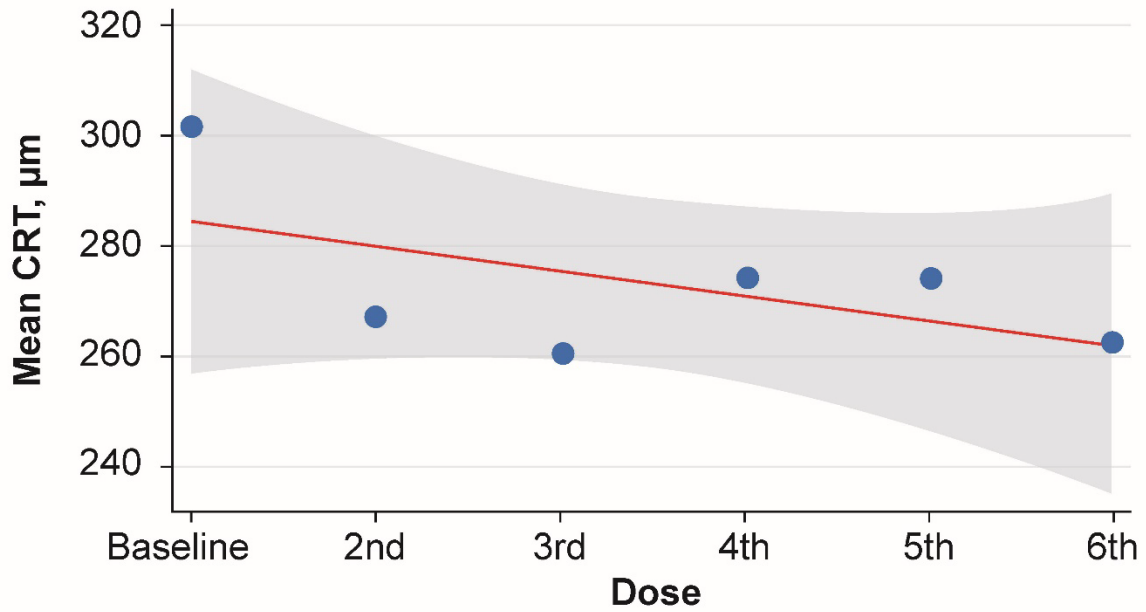

● BCVA      — Fitted values      95% CI

| n   | 73       | 73       | 73       | 64       | 54       | 45       |
|-----|----------|----------|----------|----------|----------|----------|
|     | Baseline | 2nd dose | 3rd dose | 4th dose | 5th dose | 6th dose |
| CRT | 301.2    | 266.5    | 260.7    | 274.3    | 273.6    | 263.1    |
| SD  | 65.5     | 49.5     | 54.2     | 53.6     | 54.4     | 57.8     |

CI, confidence interval; CRT, central retinal thickness; SD, standard deviation
